# Supplementary material
Source: ML conference proceedings conference paper supplement (https://openreview.net/forum?id=SSlLRUIs9e9)

CIFAR-10

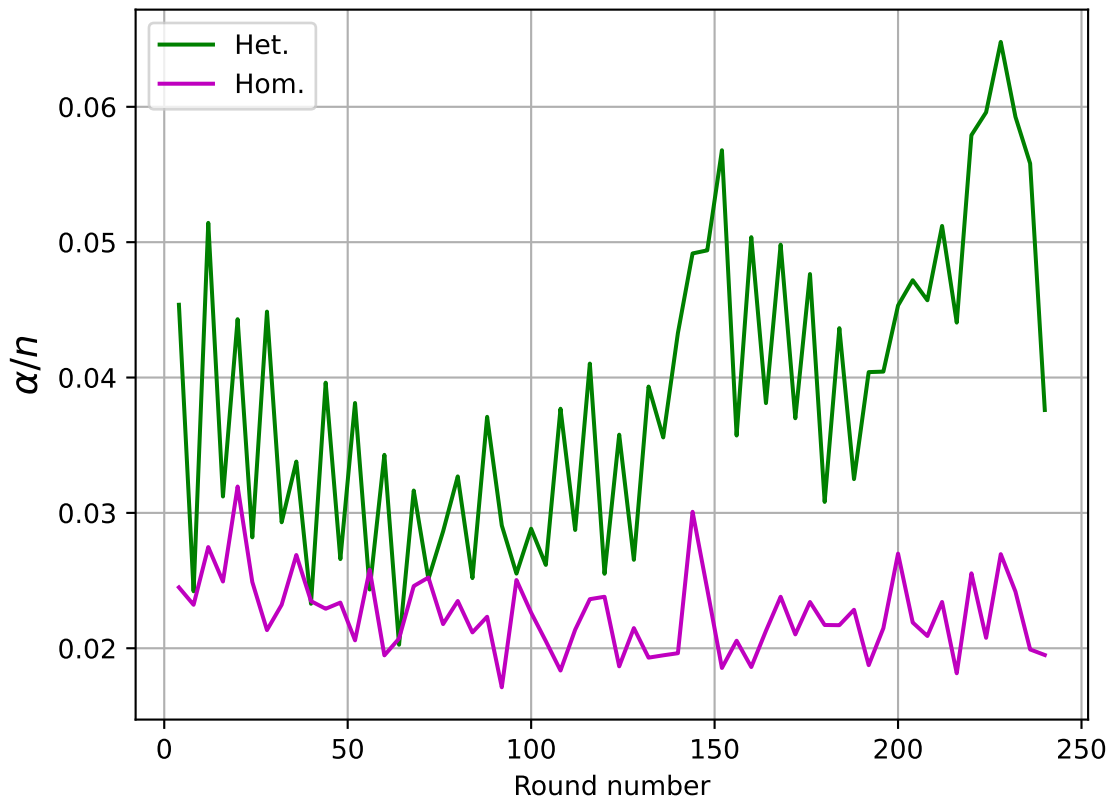

Supplement: supplementary_material [file attachment]

FMNIST (Hom.)

Training loss

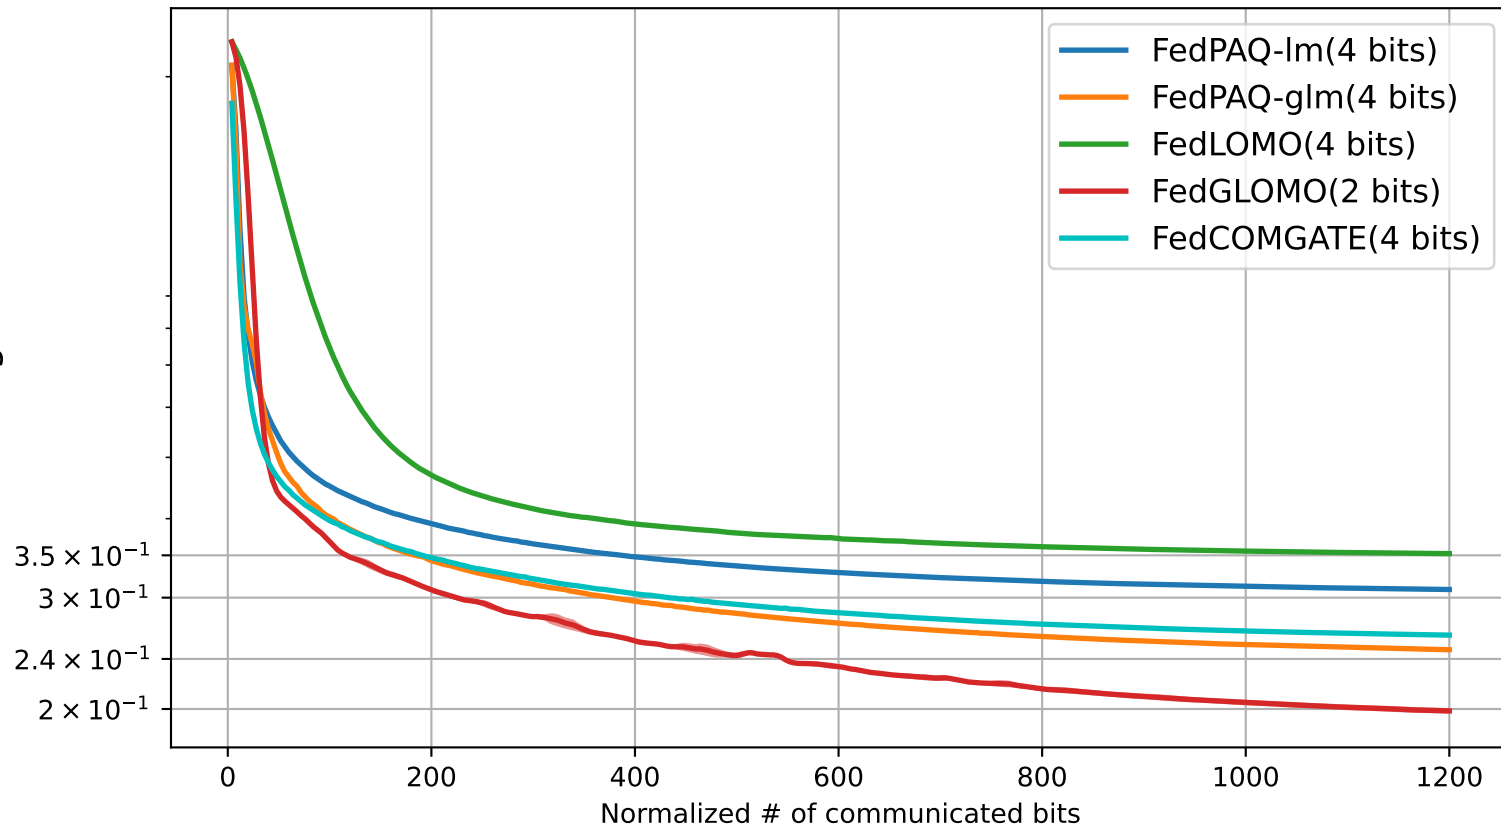

Supplement: supplementary_material [file attachment]

FMNIST (Het.)

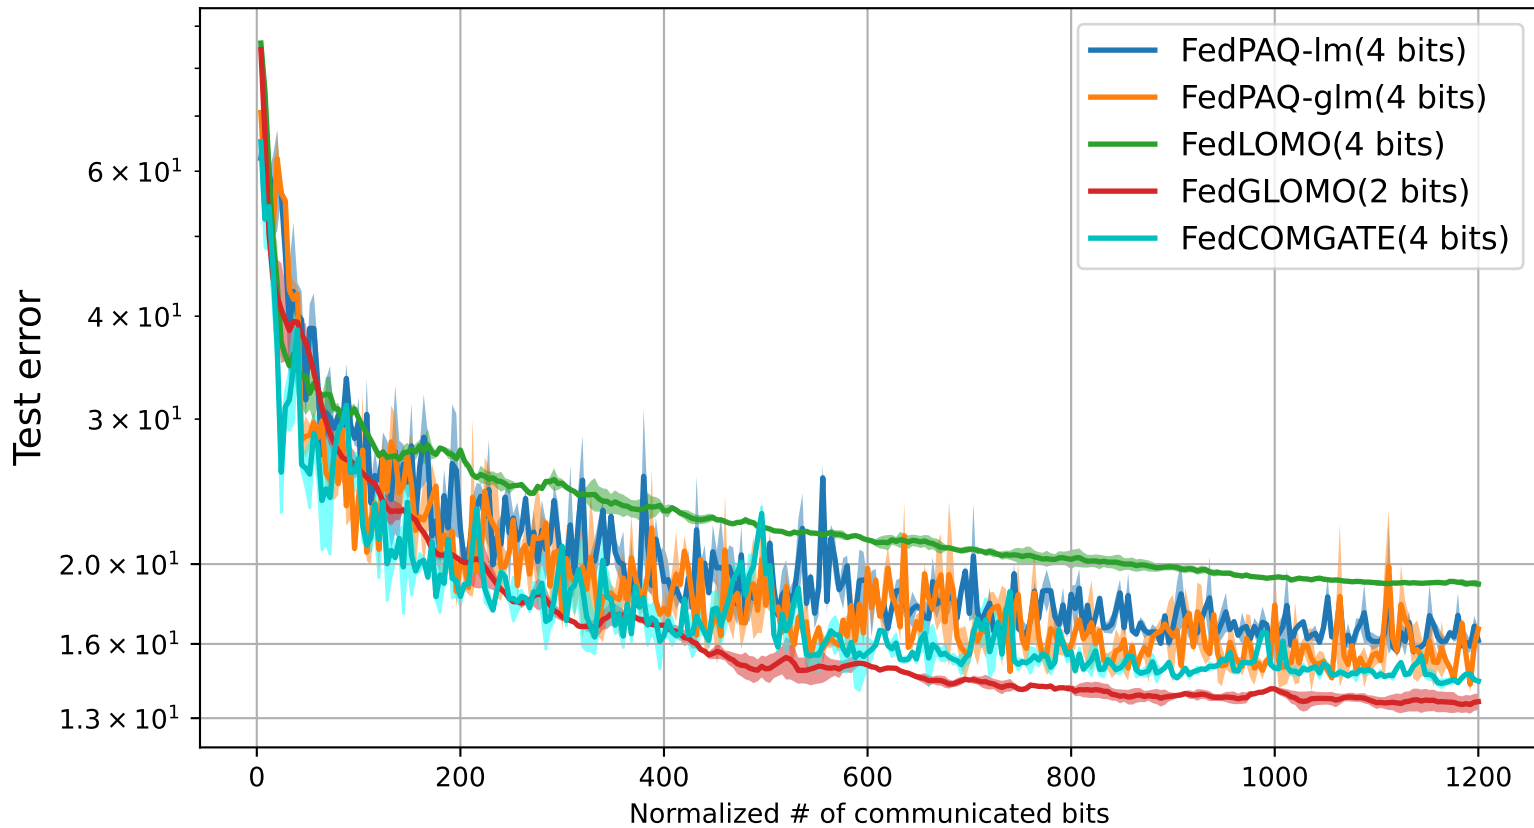

Supplement: supplementary_material [file attachment]

CIFAR10 (Het.)

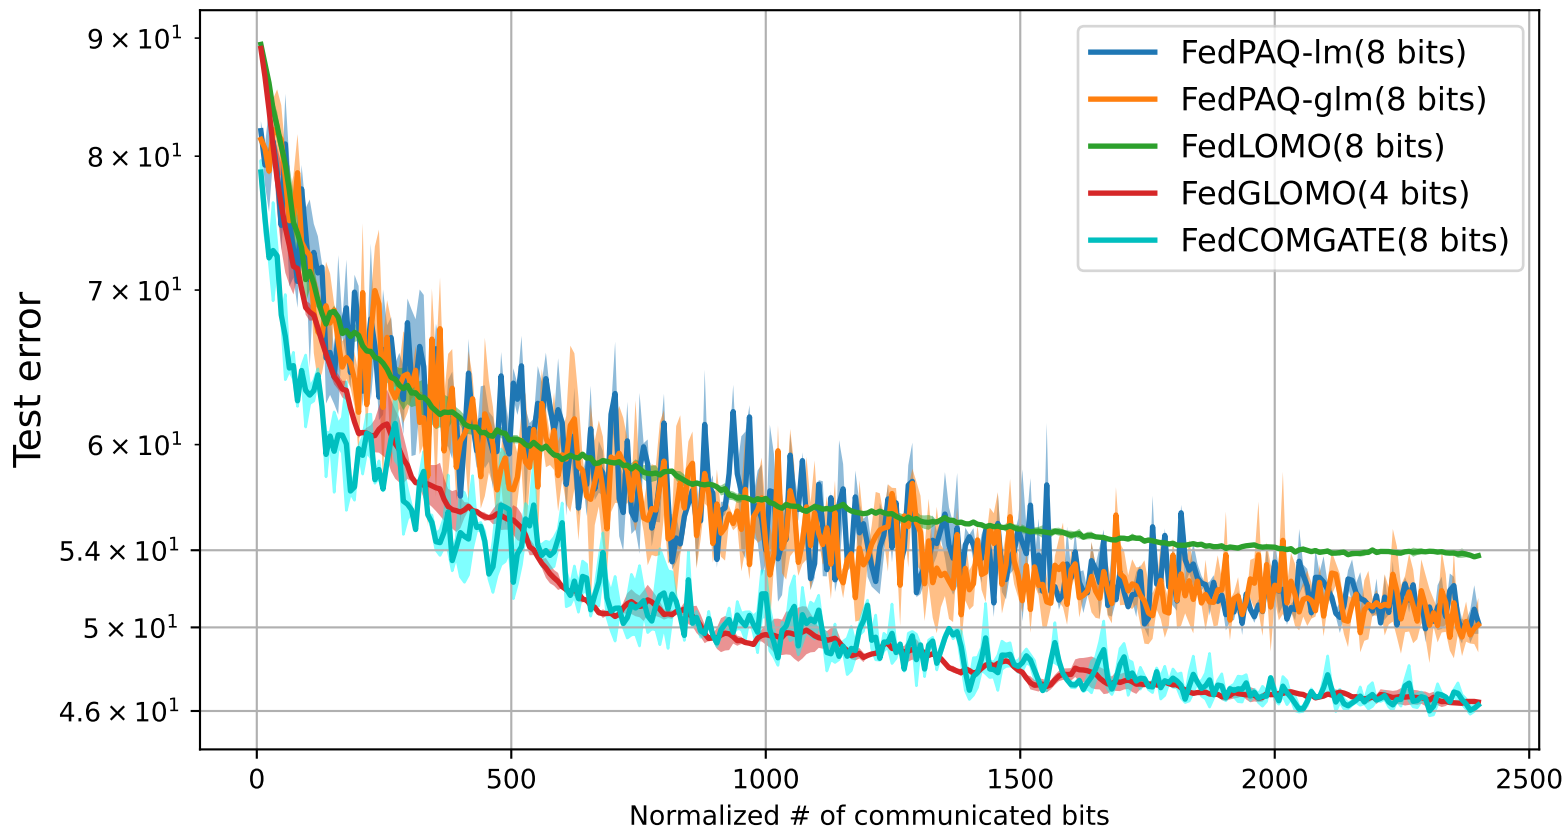

Supplement: supplementary_material [file attachment]

CIFAR-10

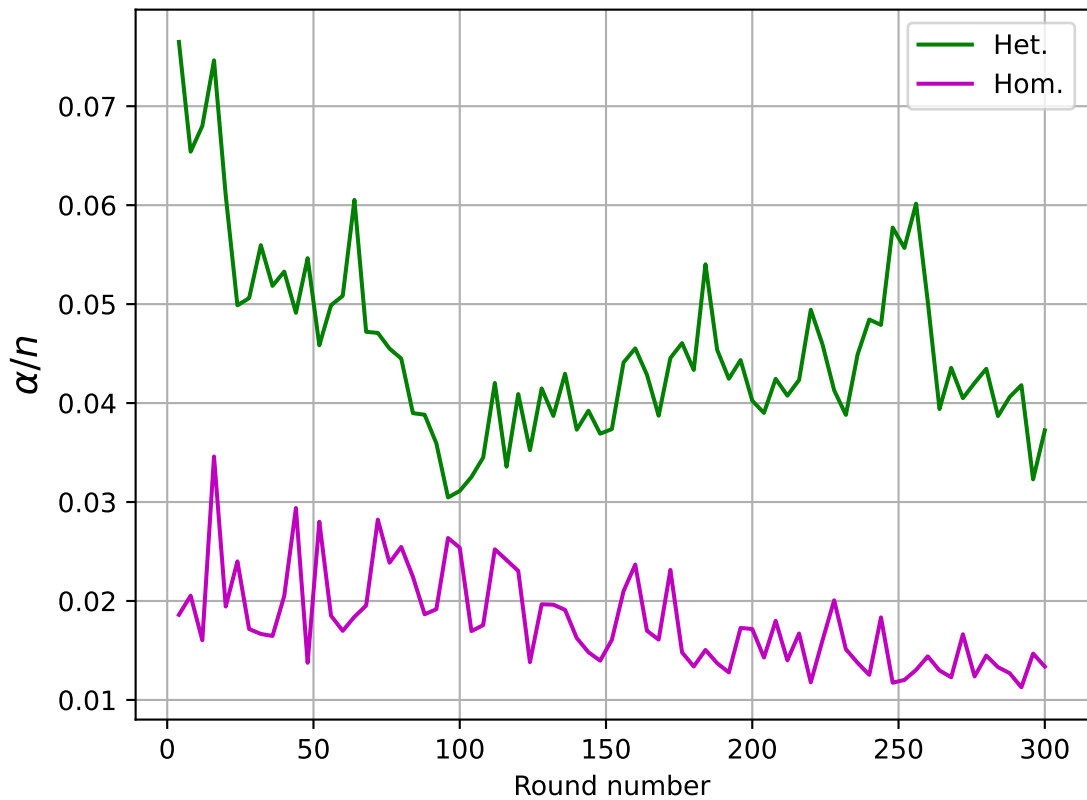

Supplement: supplementary_material [file attachment]

CIFAR10 (Het.)

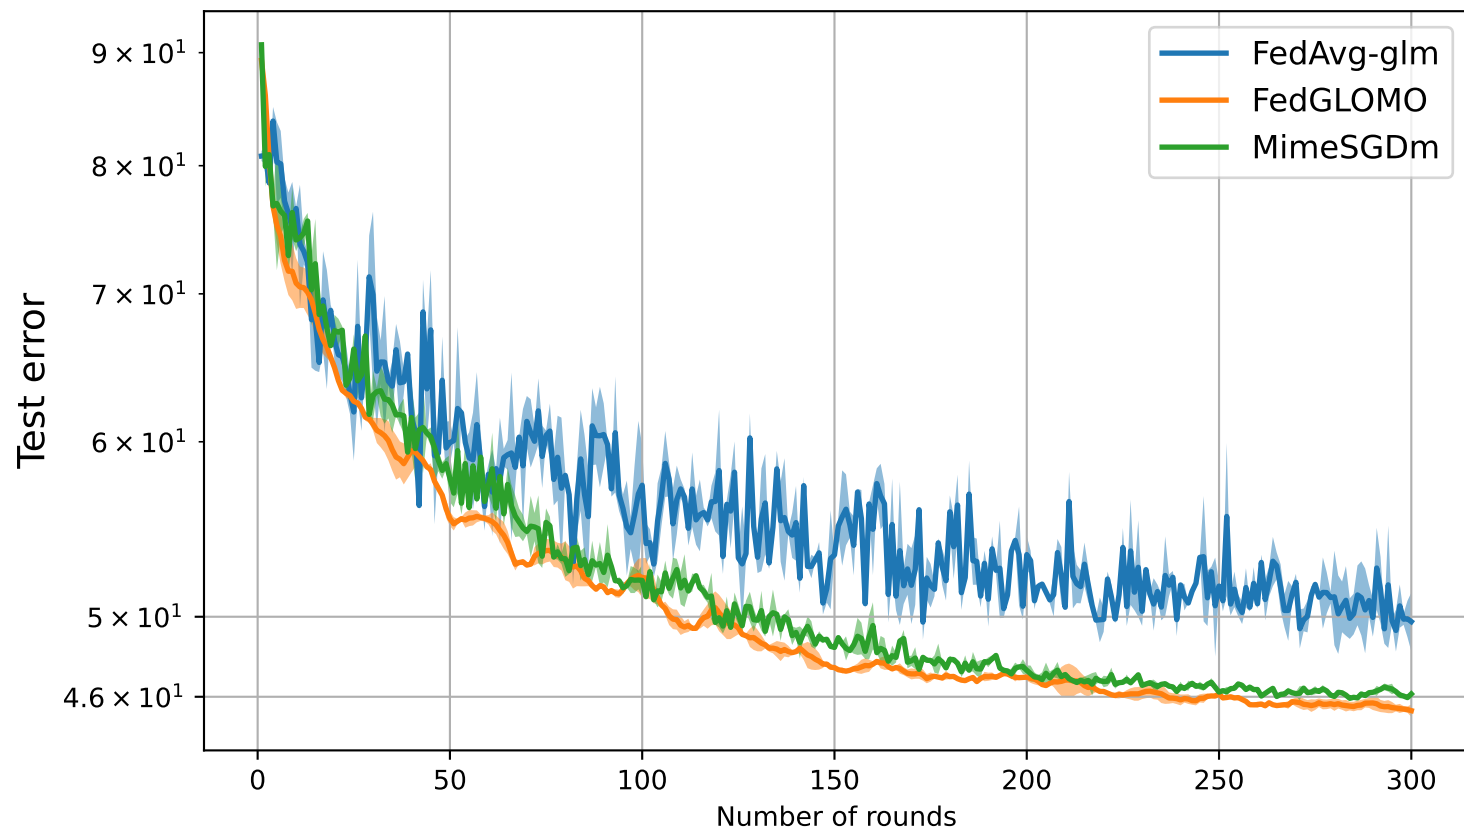

Supplement: supplementary_material [file attachment]

CIFAR10 (Hom.)

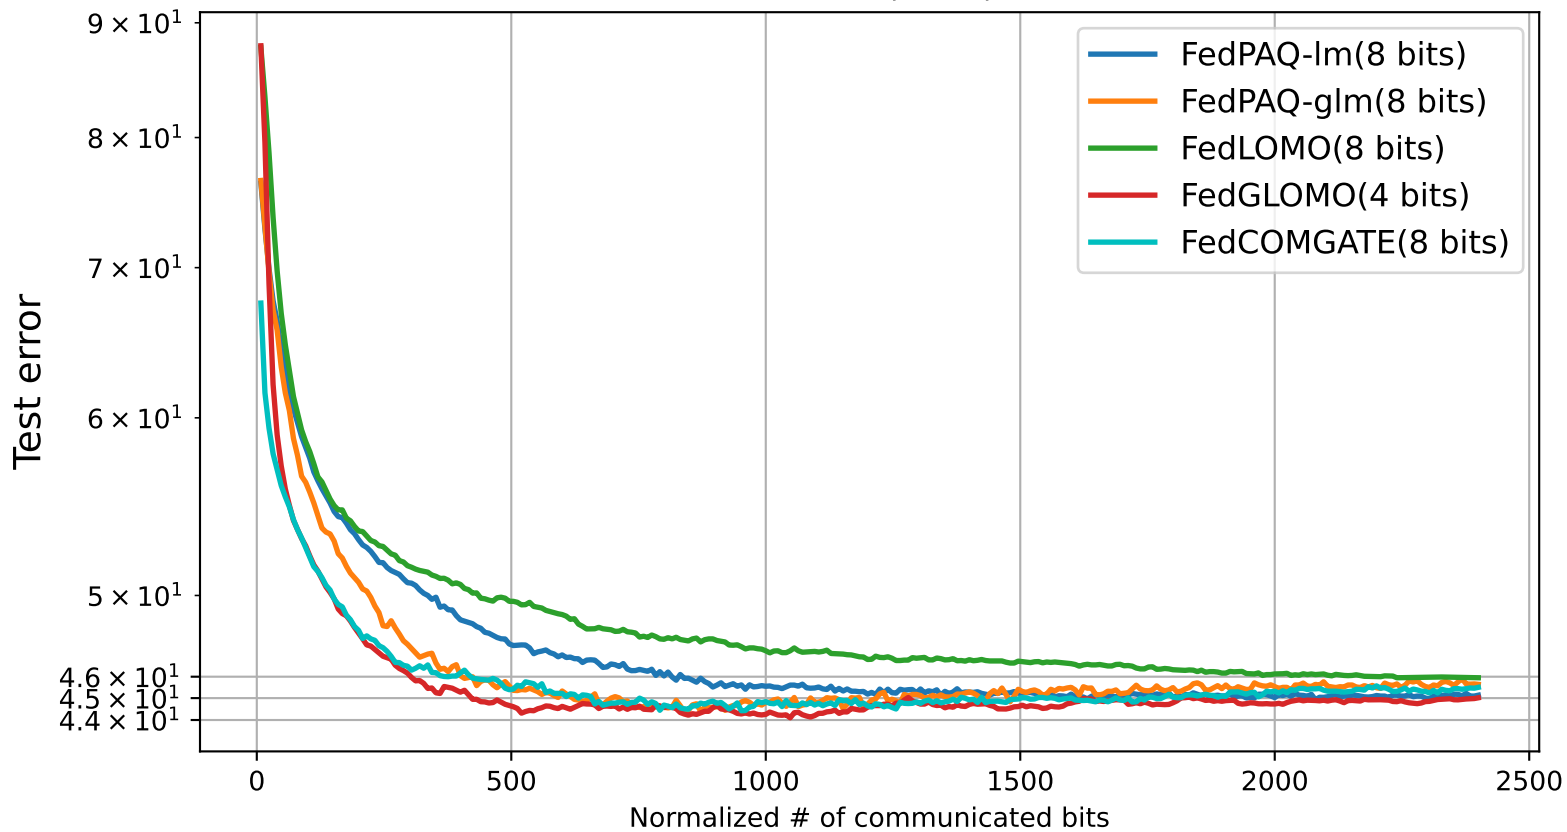

Supplement: supplementary_material [file attachment]

FMNIST

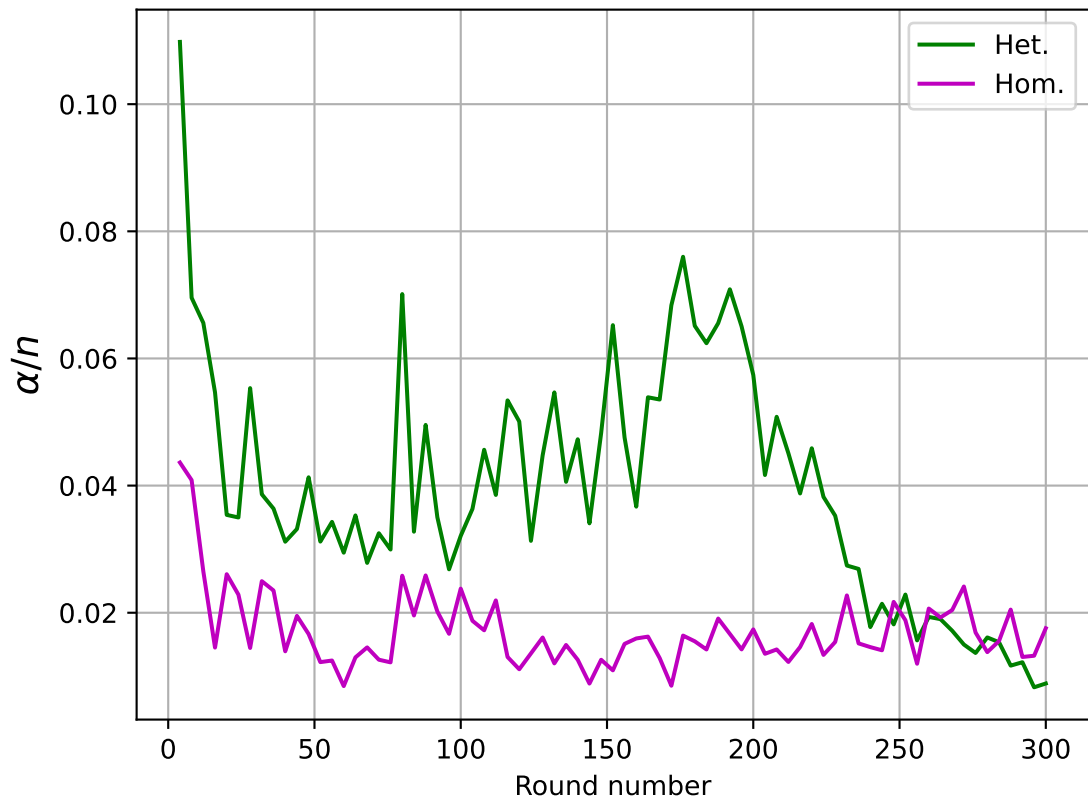

Supplement: supplementary_material [file attachment]

CIFAR10 (Het.)

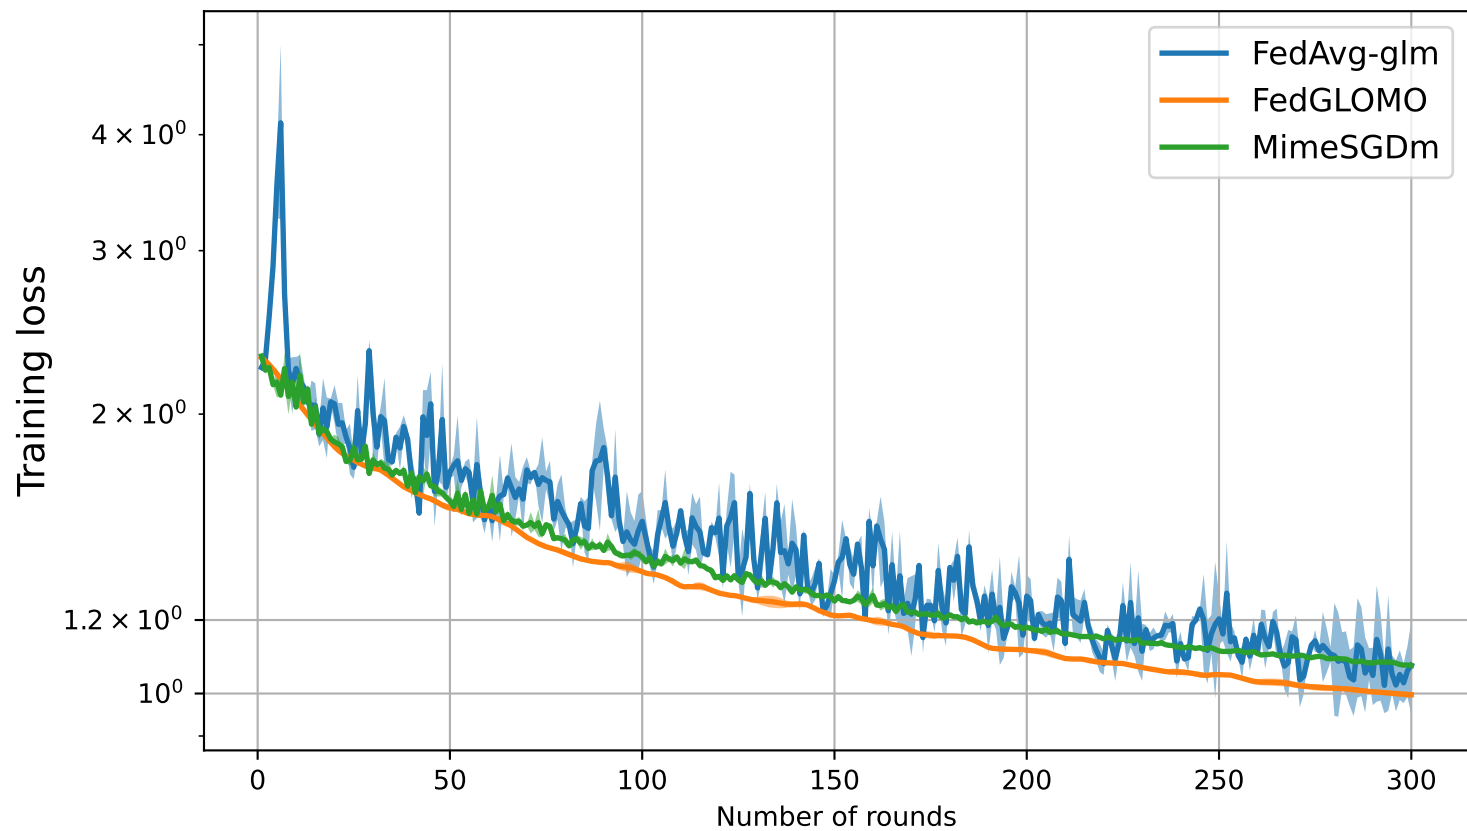

Supplement: supplementary_material [file attachment]

CIFAR10 (Hom.)

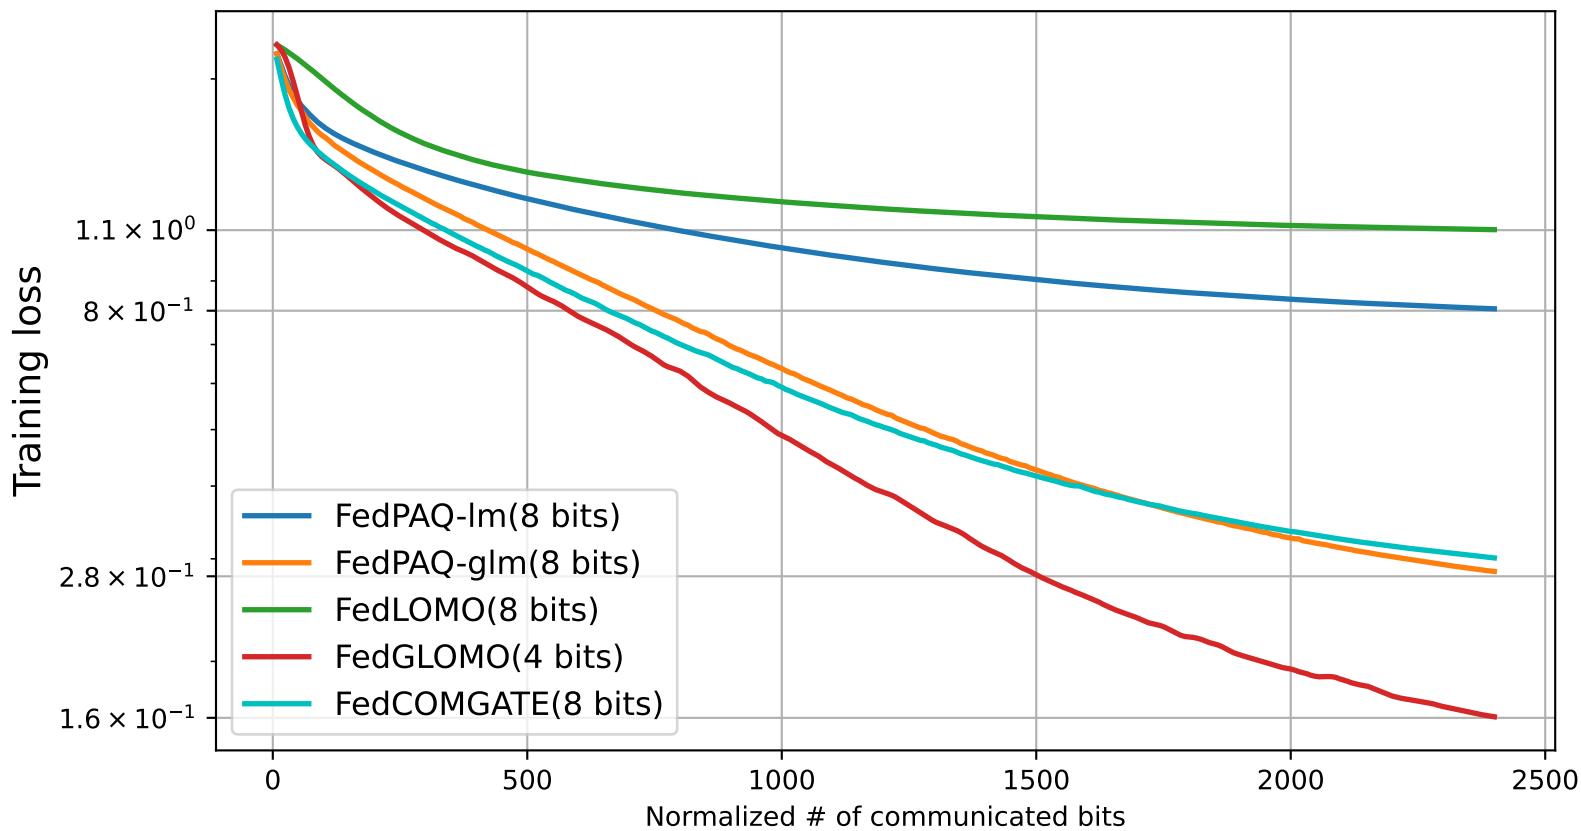

Supplement: supplementary_material [file attachment]

CIFAR10 (Het.)

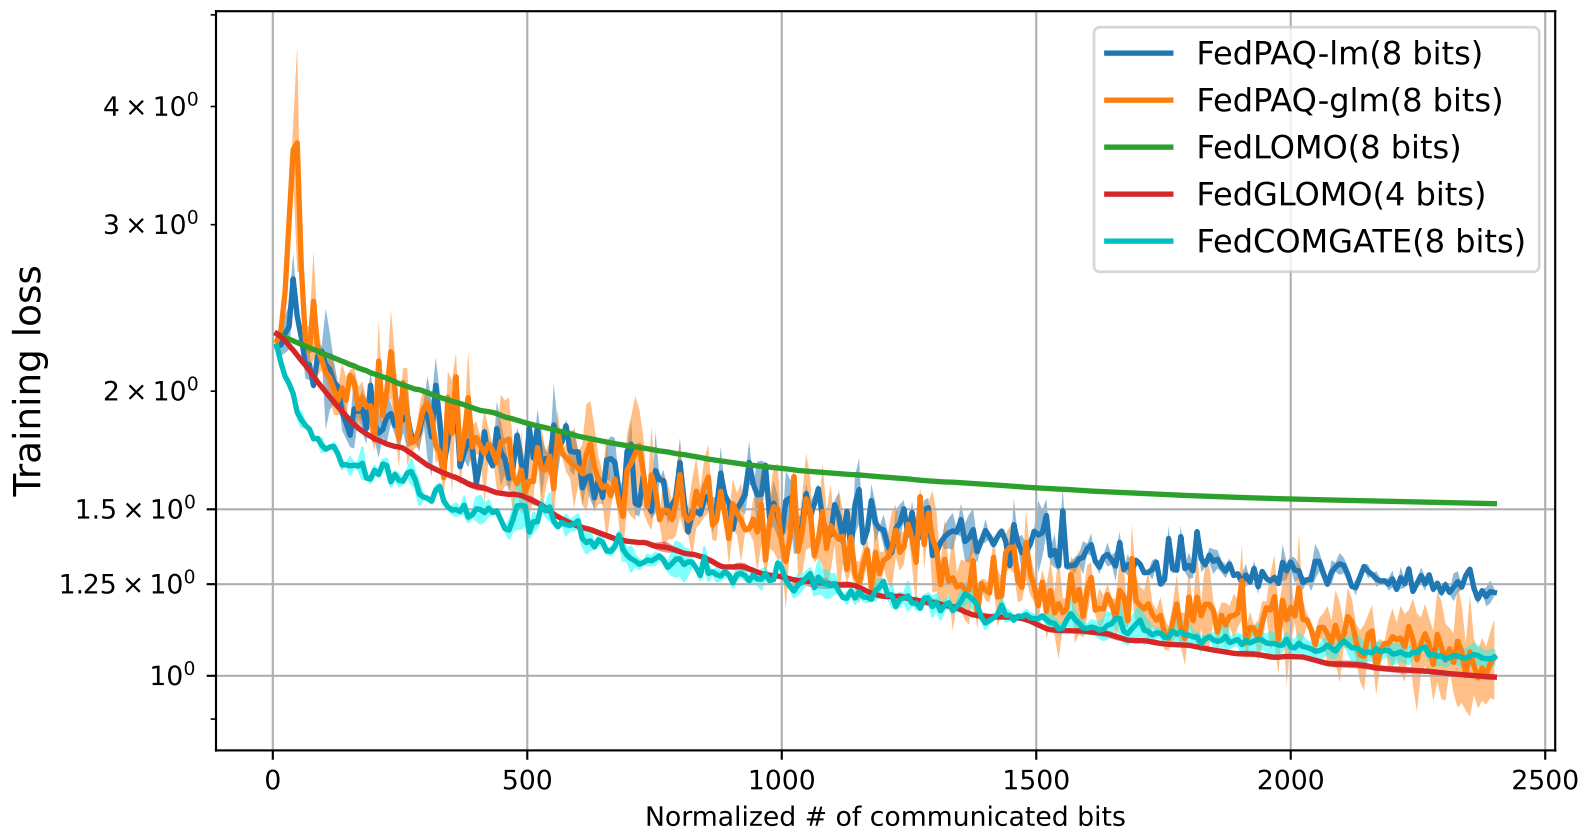

Supplement: supplementary_material [file attachment]

FMNIST

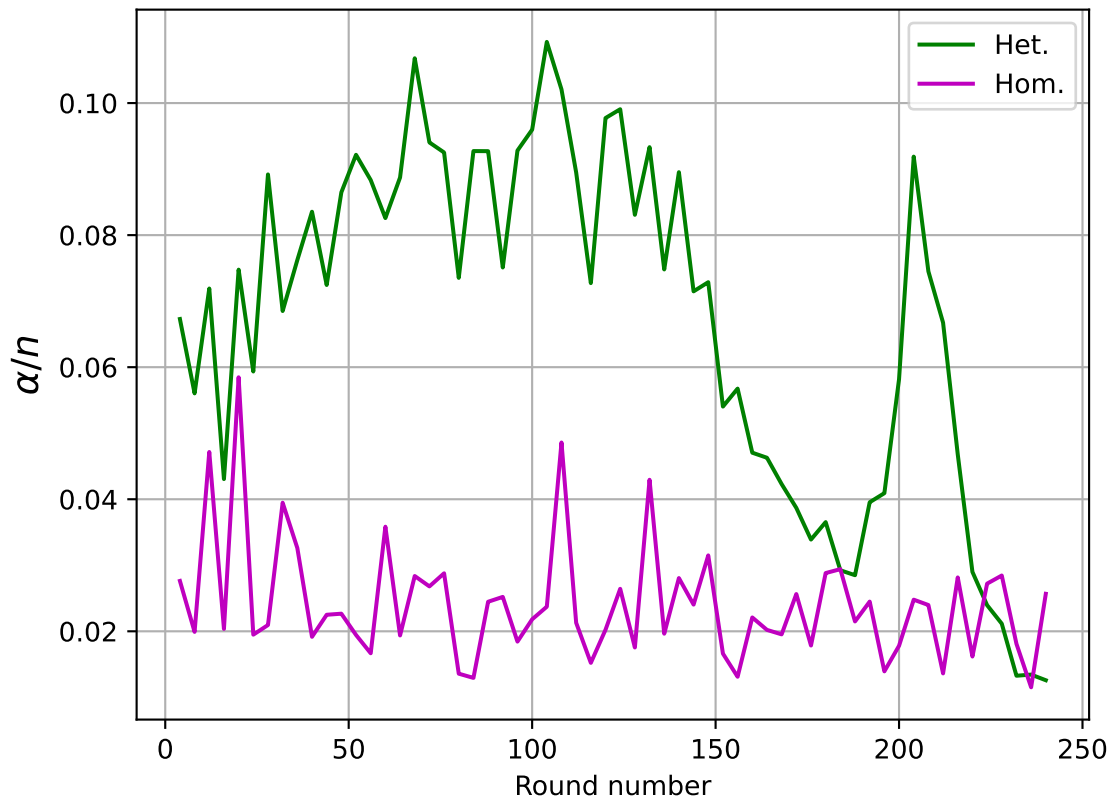

Supplement: supplementary_material [file attachment]

FMNIST (Het.)

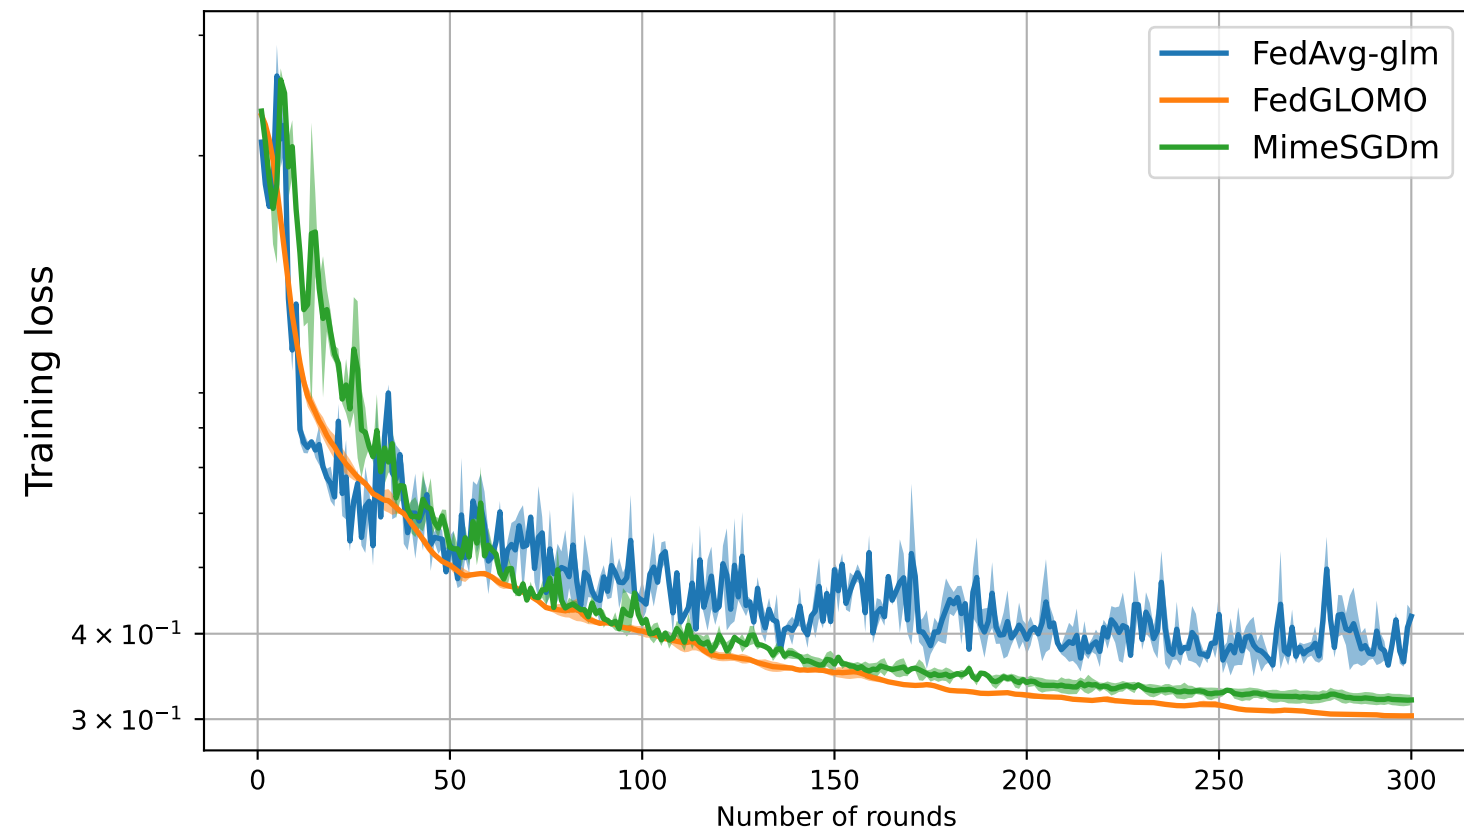

Supplement: supplementary_material [file attachment]

FMNIST (Het.)

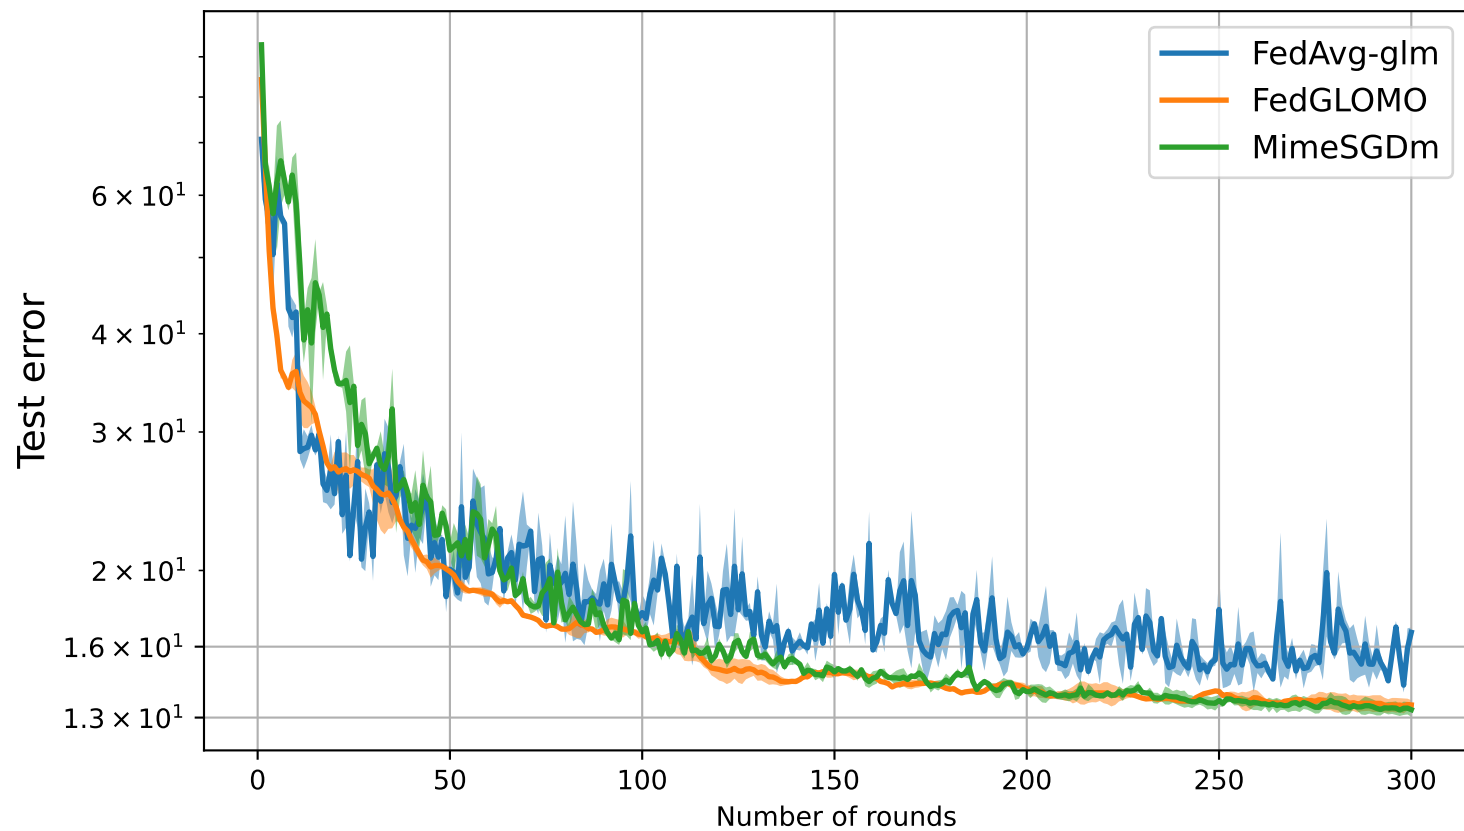

Supplement: supplementary_material [file attachment]

FMNIST (Hom.)

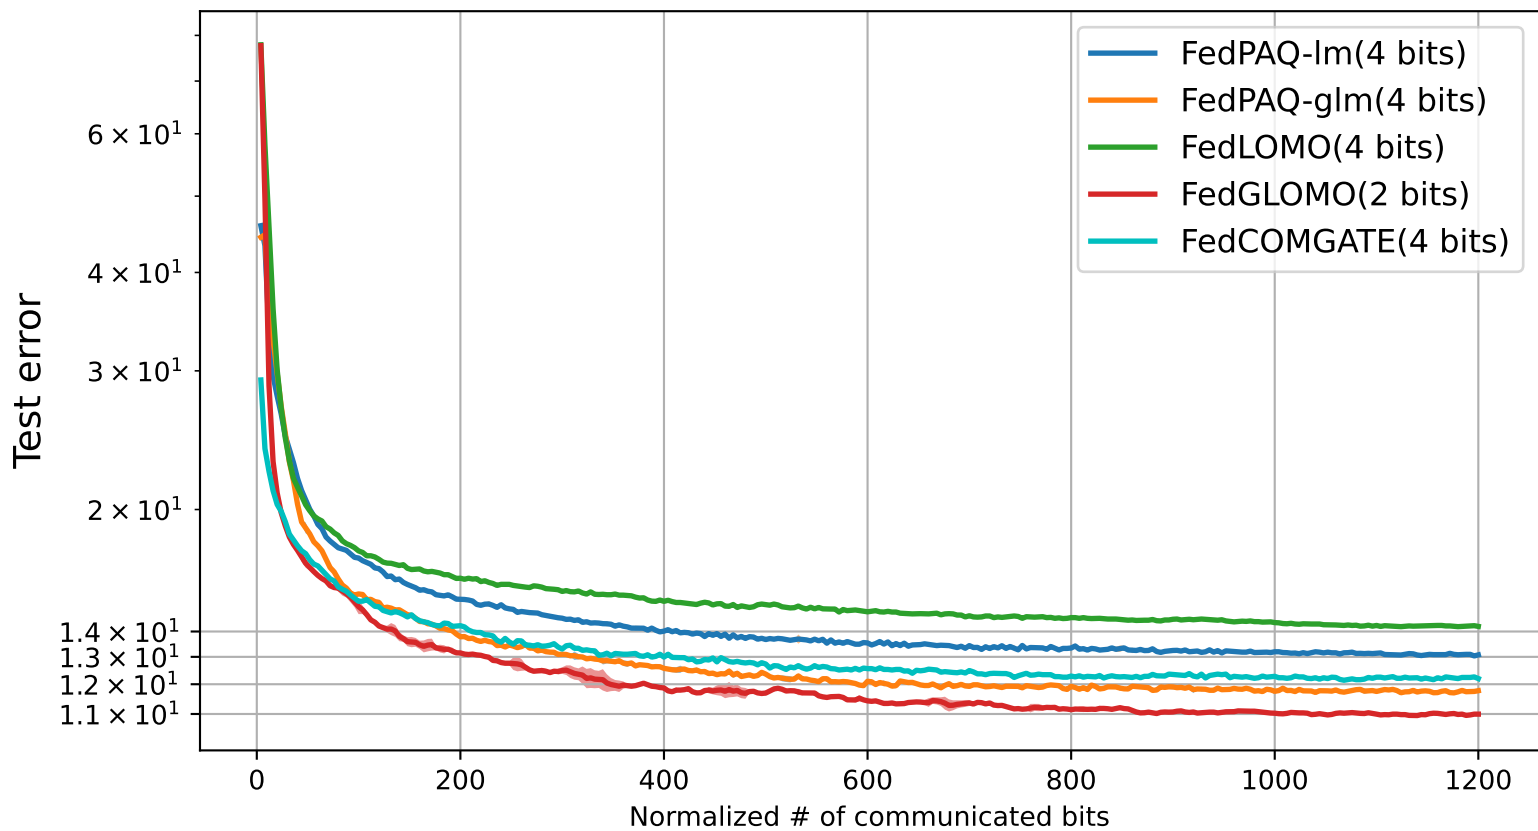

Supplement: supplementary_material [file attachment]

FMNIST (Het.)

Training loss

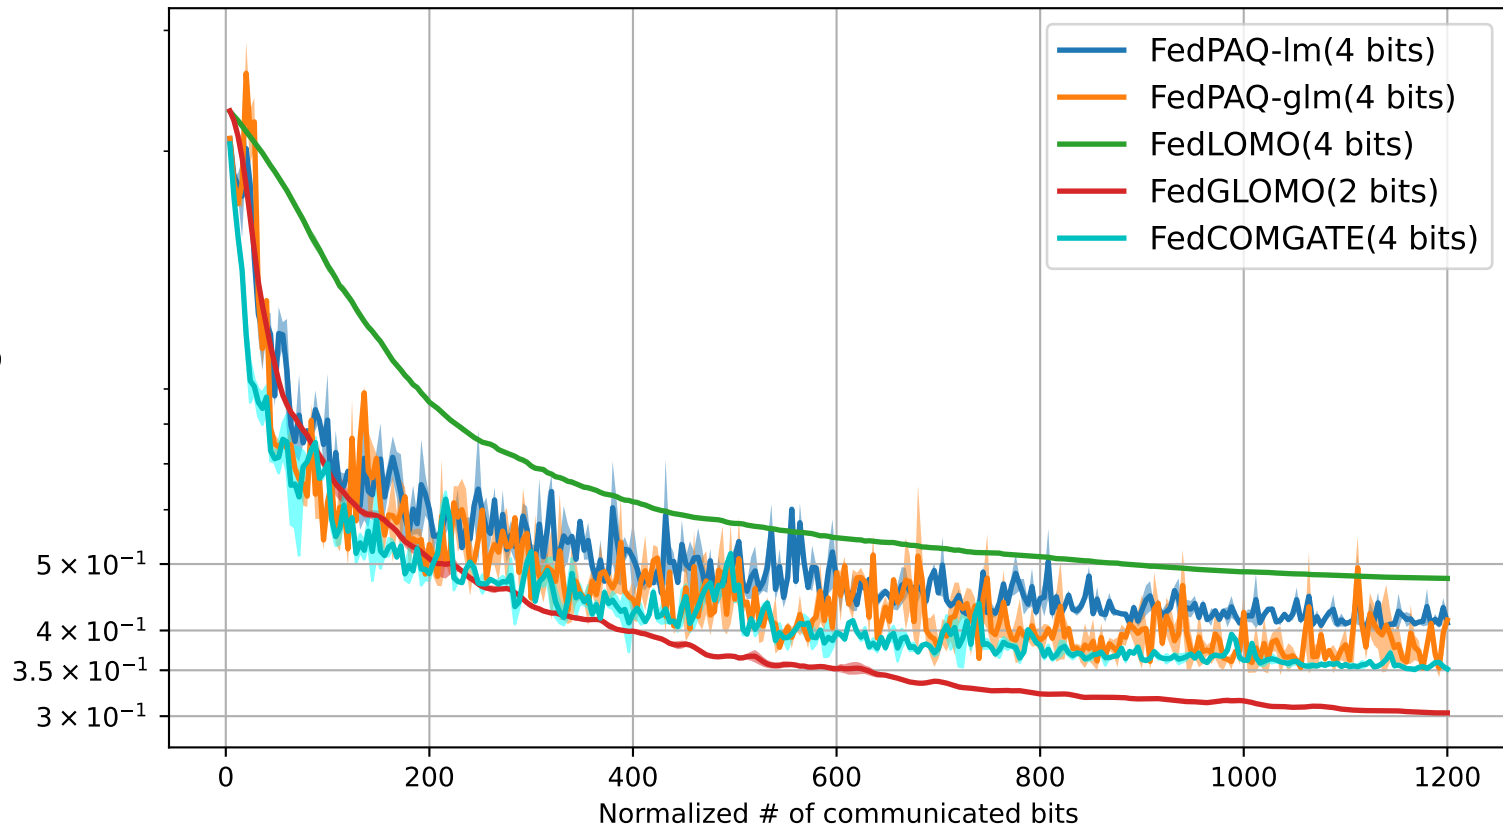

Supplement: supplementary_material [file attachment]
